# Supplementary material for: Barriers and facilitators to implementing community-based physical activity interventions: a qualitative systematic review
Source: Int J Behav Nutr Phys Act. 2021 Sep 7;18:118. doi: 10.1186/s12966-021-01177-w (PMC8422651; doi:10.1186/s12966-021-01177-w)
Supplement: Supplementary file 2 — Additional file 2. Data extraction table & Risk of bias. This table presents the data extracted from the studies included in this review (characteristics, facilitators, barriers and recommendations extracted into CFIR domains) and a risk of bias assessment using the Mixed Methods Assessment Tool (MMAT) (Hong et al., 2018). [file 12966_2021_1177_MOESM2_ESM.xlsx]

## Sheet: Characteristics
	General Info				Study Info
	Journal Title	Authors	Date Published (Year)	Country of study	Study Aim/Main outcome	Population (in study not target population for PA intervention	Sample Size	Setting (type of community)	PA Intervention aims/outcomes	Did PA increase? (intervention outcome)	Study Design	Data Collection Measures Reported (Qualitative)	Implementers: Who and How	Frameworks used to report
1	Factors facilitating the implementation of church-based heart health promotion programs for older adults: a qualitative study guided by the Precede-Proceed model	Banerjee, Strachan, Boyle, Amand, Oremus	2015	Toronto and Hamilton, Ontario, Canada	To describe the factors facilitating the implementation of heart health promotion programs for older adults in Anglican, United and Catholic churches	Pastors: ordained and authorised by their church for at least 6 months. Parishioners: Older adults, 55+, white, non-immigrant	12 interviews and 3 focus groups with 21 parishioners	Church-based	older adults health promotion to reduce CHD and related risk factors	"Much of published research to date has originated in the United States, and evidence indicates that CBHP programs can be successful"	Qualitative study	12 semistructured 1-on-1 interviews with pastors lasting between 30-90 mins and focus groups with 21 parishioners for max 2 hours	Church leaders	Precede-Proceed model
2	Implementation of a health promotion programme: a ten-year retrospective study	Darlington, Simar, Jourdan	2017	France	Increase understanding of how interactions between contexts and programmes generate variable outcomes in different school contexts. Understand and investigate the implementation process in school settings. Aims to provide a detailed and complex understanding of the factors at play during implementation	10 school nurses, 5 teachers, 3 school principles	8 schools from urban or suburban areas, with 18 interviews	School-based	programme "bien dans les baskets" to support school practice to prevent childhood obesity through healthy eating anf physical activity. In 8 high-schools from urban or suburban areas	Programme impact was not part of this study	Qualitative study	project descriptions, school records, meeting minutes, action sheets relating to PA, descriptors of other health-related projects. Individual interviews with 10 school nurses, 5 teachers, 3 school principles	Regional health agency. The REA’s health services have a role in disseminating and implementing national health promotion and education guidelines on local level. Strong advocacy on the part of the Regional Education Authority (REA) technical advisory nurse, funding and support, enabled this programme to be brought into schools.	realist evaluation
3	Implementation of health promotion programmes in schools: an approach to understand the influence of contextual factors on the process	Darlington, Violon and Jourdan	2018	France	Understand how contextual factors influence the implementation process, to result In variable programme outcomes. This study focuses on identifying contextual factors, pinpointing combinations of contextual factors, and understanding interactions and effects of such factors and combinations on programme outcomes on different levels of the implementation process	School staff and programme coordinators	4 schools,	school-based	Education, Health and Territoty programme is a school-based health promotion programme. Aims (1) to address health issues in school settings and (2) to provide school staff with the means to develop school health policy, (3) to promote children’s social, emotional and physical health, by promoting their well-being at school, and enhancing their life skills.	Programme outcome is not the focus of this evaluation	Mixed methods	Qualitative data only: two sets collected - semi-structured interviews with school staff and programme coordinators, and written documents about the actions implemented in a selection of 4 schools	Following National Health Policy, a Health Education Policy is integrated systematically in every "School Project" (document outlining focus of yearly school policy plan in particular school). Implemented training of staff in schools and support.	Realist evaluation (pawson and Tilly's framework)
4	A mixed methods process evaluation of the implementation of Jump-in, a multilevel school-based intervention aimed at physical activity promotion	de Meij, van der Wall, van Mechelen, Chinapaw	2013	Amsterdam, The Netherlands	Investigate factors influencing the adoption, implementation and institutionalisation process of Jump-in - a multilevel school-based physical activity promotion program - to optimise the dissemination of the intervention and improve its effectiveness	PE teacher, school directors, and district sports coordinators	9 primary schools and 2 city districts	school-based	Multilevel intervention aimed at physical activity promotion in schools	Participation in sports on a structural basis increased: 38% to 70% - girls went from 18% at baseline to 60% after 2 school years See previous work by de Meij for more info (2011)	mixed methods: quant and qual during 2 school years (2006-2008)	Semi-structured in-depth interviews with PE teachers and city district's sports coordinators and documentary analyses, school scan, and questionnaire	Municipal policy and city district sports coordinators	JUMP-IN innovation framework
5	Adoption decisions and implementation of a community based physical activity program: a mixed methods study	Downey, Wages, Jackson and Estabrooks	2012	Kansas, USA	Determine the attributes of a community physical activity program that Kansas State Research & Extension system agents considered in the adoption decision-making process and their understanding of evidence-based program principles	Family and Consumer Science Agents, all female, average age between 40 and 50 years and 95% caucasian	96	community	8-week walking program "Walk Kansas", increase PA participation. Invited teams, not individuals, with one as team captain. Team goal to collectively walk the distance of Kansas over an 8-week period.To achieve the goal, participants would walk on average 30 mins a day on 5 days.	Most endorsed characteristic of the program was that it was effective at increasing and maintaining PA (89%)	mixed methods	Survey including qualitative and quantitative assessments of program attributes, delivery and adaptations. Qualitative questions were open-ended.	County Family and Consumer Science Agents in Kansas were responsible for adopting and implementing the 8-week walking program. Cooperative Extension System (CES) associated with land-grant universities - available in every U.S. state and territory and provides a diffusion system wuth potential to reach a large proportion of the population	RE-AIM
6	A retrospective evaluation of a community-based physical activity health promotion program	Draper, Kolbe-Alexander, and Lambert	2009	Western Cape, South Africa	Conduct a qualitative, retrospective process evaluation concerning both factors associated with successful implementation of the programs , and implementation challenges.	CHIPs stakeholders: CHIPs staff (past and present to include those involved in the development and initial implementation), leaders and members of programs, current program funders, regional government (Provincial Department of Education)	185	disadvantaged communities. 5 programs targeting different age groups: 5-12 yrs, 18+ yrs, 55+ yrs, 18+ yrs, 3-6 yrs	Community health intervention programmes (CHIPS) is a physical-activity based health promotion programe operating in disadvantaged communities. Consists of 5 programs drawing on principles of social cognitive theory by raising participant's levels of self efficacy.	Anecdotal evidence, programe growth and experiences of those involved suggest that CHIPs has been received positively and assists in promoting more active lifestyles in these communities	Qualitative (retrospective)	Naturalistic observation, structured interviews and focus groups (n=104) and open-ended questionnaires (n=81)	Outreach Division of the Sports Science Institute of South Africa	Guidelines provided by CDC on evaluation of PA programs were used in this project: 6 steps for evaluation process: 1) engage stakeholders, 2)describe or plan the program, 3) focus the evaluation, 4) gather credible evidence, 5) justify conclusions 6) ensure use and share lessons
7	Collaborative modeling of an implementation strategy: a case study to integrate health promotion in primary and community care	Grandes, Sanchez, Cortada, Pombo, Martinez, Balague, Corrales, de la Pena, Mugica, Gorostiza	2017	Spain	Describes the steps to plan and execute a strategy, including the development of structure and supports needed for implementing proven health promotion interventions in primary and community care	Primary care staff - Primary care professionals of these centers, managers of the Basque Health Service, community partners, and researchers were engaged to model the implementation strategy. A local champion was identified in each of the collaborating centers and on-site supportive practice facilitation was provided by the research team.	4 public community centres: 71 staff (out of 89), 21 organisations	primary and community healthcare (clinical)	Primary care Health promotion to enhance physical activity, smoking cessation and healthy diet	Participants pointed out the inherent difficulty of changing behaviours, difficult to achieve short-term results	Qualitative (Collaborative modelling using bottom-up approach)	10-13 structured sessions lasting between 90-120 mins.	Basque Health Service - provides universal coverage free at the point of delivery funded through regional general taxation.	UK Medical Research Council guidance for the development and evaluation of complex interventions
8	The Daily Mile as a public health intervention: a rapid ethnographic assessment of uptake and implementation in South London, UK	Hanckel, Ruta, Scott, Peacock and Green	2019	UK	Aimed to identify how The Daily Mile (TDM) is being implemented in a naturalistic setting and what implications this has for its potential impact on population health. Identify factors that impact on whether TDM is adopted in particular settings (e.g. schools and classes); to describe how TDM is being implemented; to identify intended and unintended consequences; and to describe factors that affe…	Stakeholders and primary schools. 56% female and 44% male	63 participants total. 5 primary schools: 22 interviews, 11 focus groups including 41 participants, participant observation of 49 Daily Miles across 12 classes.	school-based	The Daily Mile is a programe designed to increase children's PA within the school day. Aims of TDM are to improve the physical, mental, emotional and social health and wellbeing of children	Indicative results from a pilot study of TDM in Stirling found that children in an intervention school had increased the number of minutes per day of MVPA, increased physical fitness and decreased skinfold measures compared to children in a non-inter- vention control schoo	A	Purposive sampling approach across 5 primary schools. Interviews and focus groups lasted approx. 30-45 mins. 63 participants participated, indepth interviews done with public health practi- tioners (n = 3), headteachers (n = 2), assistant head teachers (n = 2), school teachers (n = 5), and pupils (n = 10). Focus groups took place in school settings with teaching staff (assistant head teacher (n =…	The Daily Mile Foundation funded by INEOS promotes TDM. In this context, The Health and Wellbeing Strategy in Lewisham included a Public Health Report of 2016 which set out a whole system approach to obesity which included three key initiatives including uptake of TDM across its primary schools	COREQ checklist to guide reporting: TIDierAR-PHP Checklist
9	The implementation of health promotion in primary and community care: a qualitative analysis of the Prescribe Vida Suladable strategy	Martinez, Bacigalupe, Cortada, Grandes, Sanchez, Pombo, Bully	2017	Spain	Identify core factors associated with success and barriers in the implementation of the OVS intervention and assess factors associated with better performance in its piloting phase.	PHC professionals	4 primary care centres with 75 staff	primary and community healthcare (clinical)	Primary care Health promotion to enhance physical activity, smoking cessation and healthy diet	Participants pointed out the inherent difficulty of changing behaviours, difficult to achieve short-term results	Qualitative (Collaborative modelling using bottom-up approach)	Convenience sample: 5 focus groups, 75 participants (physicians, nurses and administrative personnel). Average of 15 per group.	Basque Health Service - provides universal coverage free at the point of delivery funded through regional general taxation.	CFIR
10	"Don't wait for them to come to youm you go to them". A qualitative study of recruitment approaches in community based walking programmes in the UK	Matthews, Brennan, Kelly, McAdam, Mutrie, Foster	2012	UK	Examine the experiences of walking promotion professionals on the range and effectivemess of recruitment strategies within community based walking programmes within the UK	Managers and project co-ordinators	28 interviews	community based	Community based walking programmes targeting participants by age physical activity status, socio-demographic characteristics or by health status. Two types of programmes were identified: those with explicit health aims and without.	not mentioned	Qualitative study	Purpose sampling: Semi structured interviews by telephone with managers and project co-ordinators of community based walking programmes, and case study participant observation with face to face interviews	Three walking promotion agencies with national representation across England and Scotland	N/A
11	Factors that influence implementation at scale of a community-based health promotion intervention for older adults	Sims-Gould, McKay, Hoy, Nettlefold, Gray, Lau and Bauman	2019	Canada	Describe factors that influence implementation at scale of a health promotion intervention for older adults	leaders of delivery partner organsizations, recreation managers, recreation coordinators, activity coaches, and participants.	124 interviews	community based	Choose to Move intervention targeting older adults. 6 month, choice-based, flexible, scalable health promotion intervention for low active adults. Includes 3 core elements delivered by trained activity coaches	Complementing paper assessing the impact of Choose to Move on older adult health indicators. Successful at increasing activity levels	Qualitative study	Semistructured interviews by telephone with leaders of delivery partner organsizations, recreation managers, recreation coordinators, activity coaches, and participants.	CTM is supported through a government grant - Ministry of Health and Active Aging Research Team	Framework for Effective Implementation
12	What happened in the 'Move for Wellbeing in School': a process evaluation of a culster randomized physical activity intervention using the RE-AIM framework	Smedegaard, Brondeel, Christiansen and Skovgaard	2017	Denmark	Gain insight into the extent by which the intevention was adopted and implemented as intended and to understand how educators observed its effectiveness and maintenance	School staff and coordinators	24 schools: 12 intervention, 12 control. 148 implementers involved. T1 = 100, T2 = 100, T3 = 93	School-based	Move for Well-being in School programme aims to improve psychosocial well-being through a multi-component school-based physical activity intervention	Effectively reached a vast majority of all teachers in the enrolled schools with a substantial impact	Cluster randomized PA intervention	Process survey completed online by school personnel at start, midterm and end of school year. Additionally, data from process meetings, informal interviews and observations were conducted throughout the year	Educators in schools implement the programme	RE-AIM
13	Translating a walking intervention for health professional delivery within primary care: a mixed-methods treatment fidelity assessment	Williams, McSharry, Taylor, Dale, Michie and French	2020	UK	Assess the fidelity of a walking intervention delivered by health care providers within general practice	Patients	12	Clinical setting - primary care	Physical activity promotion - brisk walking intervention delivered in primary care targeted to those aged 15-65, one or more chronic conditions, not meeting government PA guidelines		cross-sectional mixed methods study	Interviews with 12 patients	PA walking intervention delivered by practice nurses and health care assistants	NIH-BCC framework

## Sheet: CFIR
	Barriers					Facilitators					Recommendations					Other comments
	Intervention Characteristics	Inner Setting	Outer Setting	Individual Characteristics	Processes	Intervention Characteristics	Inner Setting	Outer Setting	Individual Characteristics	Processes	Intervention Characteristics	Inner Setting	Outer Setting	Individual Characteristics	Processes
Study 1		Competing priorities for leadership: difficult to initiate and maintain a leadership role in health promoting activities	Conflict between church and state: leaders are concerned about maintaining separation between the two and may choose to not participate in health programs funded by the government			Free or affordable. Context specific health activities (faith-based). Social support is the most useful aspect of church-based programs. Secured infrastructure (church halls and gymnasiums) that can be used at no or low cost.	Pastor leadership and modeling: leadrship to take lead role in promoting physical health and be role models. Commitment from leadership to provide health education to the congregation.	Government or diocese funding to help improve access to health resources and enhance delivery of health programs. Community involvement as a reinforcing factor to facilitate program. Spirit of volunteerism.	Leaders have knowledge of benefits of engaging and take ownership of problem (health issues)	Engaging with stakeholders outside of the church-based setting (engaging appropriate individuals in the implementation and use of the intervention)
Study 2	the strong advocacy and regional policy framework did not counter-balance the lack of evidence base in the programme selected for this work	Where schools did not implement the project the following issues appeared to be key. Identification of other issues as priority, which shifted the focus from HE and PA, high staff turnover, lack of communication within the team, a nurse in a part-time position, and not having an implementation team in place, so that people participated out of duty but without the intention to continue the project…	Instability in the policies and institutional environments in the school settings	lack of motivation in colleagues lack of knowledge of training or intervention			In schools where new projects were implemented, group participation created common ground, and a shared understanding and vision of the health promoting role of school. In schools where existing projects were extended, support from the project leader promoted sustainability Sense of ownership from staff is fundamental to successful implementation	1 of core guidelines is the Health Education (HE) Policy prescribed by the Ministry of Education (Ministère de l’Education Nationale, 2011). This policy materializes through the formalization of HE, as a core item of teachers’ missions, as well as the obligation of schools to implement school projects which include health and well-being objectives in addition to educational objectives. School Hea…	providing a new impulse and preventing the team from losing motivation, and drop out.	Design which takes into account the specific charcateristics of the context - enables the selection of the appropriate approach for a given school, which makes the best of existing resources, creates a team and generally focusses on what will make a difference.	Policy can be a formidable tool for health promotion as long as its understanding and development is consistent with implementation in the specific context.		need for local support and consultancy services for school-based implementation and policy development is apparent. Needs to provide long-term funding and provisions of trained workforce who can support local level polic development and implementation
Study 3	The name was unclear and determined reluctance to participate in the programme at district level Programme content: more focus on pragmatic issues, more focus on needs of different schools at start of programme	School climate: school staff who experience full professional burn- out or degrees of professional exhaustion would not devote any extra time for school projects or actions All the schools from same school district could not be enrolled which led to tensions and reluctance.	Fact that programme was initiated by a community decision-make did not strengthen the weak ties between the schools and the community. quality of home/school relatioship seemed to overpower the beneficial effect of leadership on the part of the school head where the relationships between parents and staff were very poor	negative effect: Participation was sometimes as being imposed values conveyed by the programme were inconsistent with the reality of school life motivation	Insufficient means were allocated which hindered the implementation of the training Institutional support from head of regional education authority meant implementation was perceived as following top-down mode and adding constraints Top-down implementation/initiation mode impacted implementation greatly in a negative way	More room for initiative on the part of district teams led to higher implication of trainers/training Programme content had a positive ffect on appreciation due to pragmatic and concrete nature	Training facilitated coordination Development of relationships between participants counterbalanced fact that programme was imposed by staff at higher decision-making levels	Institutional support from head of regional education authority promoted active participation The relationship between school staff and district level decision-makers of school management influenced the opportunities for school staff to show ownership and develop action.	Inclusion of training in programme had positive effect as staff felt programme was in line with their expectations		Potential barriers need to be anticipated and addressed before implementation				need to give attention to programme initiation modes and empahsize importance of negotiated planning. Collaboration between all aspects of community and setting from start of programme implementation and before programme is introduced	a single programme cannot be transferred to all contexts
Study 4	Discrepancy between recommendation to standardise and simplify the intervention and the need to tailor the strategies to local environmental, social and cultural aspects poor availability and accessibility of necessary facilities lack of evidence-based treatment programs	Lack of perceived responsibility and motivation among schools and underestimation of the efforts needed to attract parents led to poor attendance at parental info meetings personnel turnover	Complexity of programme requiring multidisciplinary collaboration between organisations Lack of policy regarding target group lack of existing sports clubs lack of overall coordination hampered communication between organisations complex financial structures between collaborating organisations	Moderate perceived importance of parental info by school staff Perceived workload need for more info and clarity about tasks among staff poor parental attitude	Complexity of intervention causing delay in preparation period lack of time to coordinate organisational procedures in order to increase efficiency	Compatability of intervention tasks with PE teachers and city district sports coordinators regular function clear protocols, task descriptions well-defined program components potential for tailoring support from intervention team	Connections with existing structures such as coffee meetings increased attendance at intervention info meetings for parents clear information and communication strategies within organisations strong commitment and motivation from organisation to comply with shared goal easy to integrate intervention goals, methods, procedures and tasks within organisation	Effective cooperation beyween school, city district and sports clubs high perceived fit of intervention in policies availability of financial resources political advocacy and support effective communication strategies between stakeholders formalisation of partnerships continued participation of all partners	Intense motivation of thecity district's sports coordinator and PE teachers high perceived importance of intervention goals and participation positive attitude and beliefs of political stakeholders positive attitude toward adaptations and changes in policies and practices realistic expectations about tasks and responsiblities	Involvement of experts in tailoring the program to the school characteristics Support from experts	standardised, simplified and scalable program components reduction of complexity in content and delivery		formalised coalitions, integration of policy and synchronisation of tasks and protocols	More attention for parental skills and involvement of the social and physical home environment is recommended to improve parental self-efficacy	stepwise implementation smart planning and control by clear communication and feedback instruments use of social marketing principles
Study 5						Accountability between participants Low cost No special equipment needed Easily fits within participant's lifestyles length of program isn't overhwelming		Business and newspapers are huge supporters	Agents understood the basic functioning principles of the programe		Program materials need to be kept fresh for agents so program doesn't seem repetitive Maintain cost to participant (do not raise) scale up		Increase media support Include in state legislation Easier to communication to participants		Maintain program champion Maintain ease of delivery
Study 6	Lack of resources unable to ensure safety and security of participants finding suitable and affordable venues was a difficulty	Staff feel pressurised by work and time constraints staff not feeling their involvement in program is worthwhile affects sustainability of intervention	Communicating with parents the importance of programe outcomes was a challenge cultural barrers within communities lack of community buy-in	Challenging to find committed leaders who are able to lead without CHIPs staff is a challenge		Evidence source was a factor contributing to sustainability of program (scientific support and credibility) Offer unique program within communities in which it was implemented requires little start-up equipment affordable for target participants Geographically accessible Program content allowed for modification where necessary: improvised using other equipment where it was lacking for certain exe…	Sense of belonging within each branch organisational environment of CHIPS as contributing to its sustainability exisiting culture of working together helped to facilitate implementation buy-in from leaders was essential factor	Accessible to communities in which it was implemented Created a sense of unity through working towards a common goal Motivation and commitment of community members helped further facilitate implementation	Perception of members, leaders and CHIPs staff that CHIPS uplifts communities through their involvement Members and leaders experienced increases in self-efficacy CHIPS leaders individual characteristics that had positive influence: well trained, wanting to be involved, feeling empowered, dedicated, passionate, motivated	Empowering communities through consultation process where their needs were identified Appointed communit-based members as leaders was viewed as empowering and important for maintaining continuity Existing community infrastructure was seen to facilitate CHIPS implementation process						The concepts of success and failure center around the issue of sustainablility
Study 7		Awkward language used in training materials for staff and heavy workload	Cooperation among all the PHC center staff and linkage with community agents are extremely challenging and complex social processes.			the development and availability of innovative information and communication technologies		linkage with community resources active participation of appropriate stakeholders in the decision-making process to adapt the intervention to a specific context		Engagement of whole organisation team and community members involved in shared decision-making and cooperation in a community-based program	innovative ways of motivating patients not ready to change and ensuring continuity of care for those with intention to change behavior to minimize false expectations	at PHC center level: reorganization of on-demand care to minimize work overload, to improve the coordinated flow of care to avoid extra visits by patients, with coordinated working at all professional levels, to foster communication between different tiers of professionals and to provide sufficient staff resources. improvement of efficiency and reliability of the information and communication too…	at community level: improvement of coordination with community resources to align forces and avoid duplication of efforts			Critical areas for optimisation to enhance the feasibility and sustainability
Study 8	Spatial and temporal constraints and erosion of curricula time acted as key barriers that prevented TDM from taking place. variations in implementation (adaptations) were made as a result. Physical barriers such as several flights of stairs or restricted outdoor space	School management view: Schools have limited capacity to take part in multiple initiatives. How the intervention fits into existing curriculum and timetables that are already full. Competing demands/expectations of school/exams was a major barrier to implementation				No special clothing or equipment needed		Support from local authority	Teachers and heads could identify a wide range of benefits from engaging with the scheme		Using ongoing research to assist organisation/schools in maintaining fidelity to core principles				Understanding if and how these decisions are made and what trade-offs are made at the level of the school is important for understanding intervention implementation	Adaptation: Variety of implementation practices in a non-trial setting, which result from various spatial (e.g. playground area) and temporal (e.g. time of year, time of day and/or weather) constraints as well as the presence or absence of other physical activities in the school. TDM required extensive input from publich health department
Study 9	Failures in new information and communication technology support tools integrated and delays in fixing them has a negative effect Tools and demands not being adaptable to context - doesn't fit well or unrealistic	High level of organisation needed can lead to confusion when this is lacking and losing sight of program goal			Statistical demands of program - doesn’t reflect reality and is very stressful	Evidence strength and quality strongly distinguished between high and low implementation performances Collaborative effort	Providing monthly feedback lead to staff valuing it and being encouraged to reflect and prompted team discussions to identify problems and look for solutions		Feeling of ownership of programme for participants Personal effort	Bottom-up process of involving key stakeholders in discussion, consensus and a decision making process about priorities according to specific context and about the workflow and role and contributions of different members can lead to a greater sense of ownership and commitment to adhering to the program
Study 10	resource availability	lack of effective delivery of training to staff which might help to facilitate sustainable walking programmes for targeted groups conflicting aims with members who don't identify with the same agenda	Limited resources and funding from funding partners to support effective recruitment			Adaptability of recruitment strategies to target population and context		Trust and motivation which partner organisations build up with their clients tapping into the cultural norms and behaviours of potential participants in target context		Having a theoretical model to inform recruitment process and tailor strategies to target groups			Need to work in partnership with organisations and agencies working in target groups, especially in hard to recruit groups
Study 11		Leaders indicated that their organisations have the infrastructure and capacity but not the financial resources In smaller communities it was difficult to find and retrain fitness leaders			Recreation coordinators underestimated the time and effort to recruit and deliver in many communities	Programme was considered timely, necessary, relevant and scalable. Evidence-base developed by researchers made CTM more credible for those delivering programme and for participants activity coaches were able to make small changes to program to facilitate implementation (such as content due to time constraints/relevance to context) adapting to community context	Leaders noted complete alignment with their organisational priorities, vision and strategic directions Having coaches from within the organisation helped with implementation of the program - coordinators already have a relationship with them	Linkages with Ministry of Health as essential for scale-up and possible mechanism to ensure sustainability Role of support and research system was viewed as intrumental to successful implementation Strong leadership and active engagement by a range of stakeholders facilitated implementation	Pivotal role of activity coach in delivery of CTM - augmented when coaches took ownership of programme Strong feeling of reward from participating as a coach Positive attitudes and encouragement from coaches make big difference to participants	Support and research lead checking in with program staff facilitated problem solving and feedback loops Use of wide variety of strategies to implement the intervention Co-designed with community partners over 2 years ensure adequate time to promote programme, generate materials and conduct training						More research focus is needed on fidelity to implementation strategies
Study 12		Some activities required too much of a change compared to previous practices in the area - difficulties integrating into normal practice Lack of time for preparation, lack of coordination between teachers,	challenges with participant acceptance of program			opportunity for local tailoring	Competence development program		workshops were significant for individual motivation
Study 13						role of the provider in delivering the intervention was one that was perceived positively by participants	Each provider received training to facilitate effective delivery of the intervention		Perceived value in the approach of the implementation of the intervention even though it differed from usual practice		Recording sessions to assess fidelity of delivery can in itself serve to enhance fidelity of delivery				Intensity of contact between research team and providers may have contributed to level of adherence.

## Sheet: Risk of Bias
Study	Methods	1	2	3	4	5	Comments
1	Qualitative study	y	y	y	y - quotes justify theme	y
2	Qualitative study	y	y	y	y	y
3	Mixed methods	y	y	y	yes - no divergence	y - there were limitations to data collection method but they were acknowledged
4	mixed methods: quant and qual during 2 school years (2006-2008)	y	y	y	yes - no divergence	y
5	mixed methods	y	y - very clear	y	yes - no divergence	y
6	Qualitative study (retospective)	y	y	y	y - quotes justify theme	y
7	Qualitative (Collaborative modelling using bottom-up approach)	y	y	y	y - clear diagrams	y
8	Rapid ethnographic assessment - pragmatic, mixed methods approach	y	y	y - checklist used to ensure adequate interpretation of outputs	yes - no divergence	y
9	Qualitative (Collaborative modelling using bottom-up approach)	y	y	y	y - quotes justify theme	y
10	Qualitative study	y	y	y	y - quotes justify theme	y
11	Qualitative study	y	y	y	y - quotes justify theme	y
12	Mixed methods: Cluster randomized PA intervention	y	y	y - but slightly less consideration given to qual data. No explicit use of quotes.	yes - no divergence	y	slightly unclear about type of questions used in survey (quan vs qual)
13	cross-sectional mixed methods study	y	y	y		y - there were limitations to data collection method but they were acknowledged
